# Supplementary material for: Cell-Free DNA as a Prognostic Biomarker for Monitoring Muscle-Invasive Bladder Cancer
Source: Int J Mol Sci. 2022 Oct 3;23(19):11732. doi: 10.3390/ijms231911732 (PMC9570339; doi:10.3390/ijms231911732)
Supplement: Supplementary file 1 [file ijms-23-11732-s001.zip › ijms-1920137-supplementary.pdf]

## SUPPLEMENTARY METHODS

### - Determination of annealing temperature

The CloneJET PCR Cloning kit (Thermo Fisher Scientific) was used for cloning each gene region containing the specific mutation as well as the wild-type allele, according to the manufacturer's protocol. Chemocompetent E. Coli DH5 $\alpha$  derivatives (New England Biolabs) were used to transform the cloning products following the High-Efficiency Transformation protocol (C2987H; New England Biolabs) with minor modifications. Briefly, 50 ng of the cloning product were mixed with Dh5 $\alpha$  cells in a final volume of 70  $\mu$ l and tubes were incubated for 20 min at 4°C. Then, cells were heat shocked at 42°C for 90 seconds and cooled on ice for 2 minutes. LB medium (350  $\mu$ l) was added to the transformed bacteria and the mix was incubated for 2 hours at 37°C with agitation. LB agar with 50  $\mu$ g/ $\mu$ l of carbenicillin plates were used for seeding the transformed bacteria as the pJET1.2/blunt vector carried  $\beta$ -lactamase, an ampicillin resistance gene. The bacteria were incubated overnight at 37°C. The isolated colonies grown on the carbenicillin plates were picked and inserted in a tube with 5 ml of LB 50  $\mu$ g/ $\mu$ l carbenicillin medium, and then were incubated for 12 hours at 37°C with agitation. QIAprep Spin Miniprep Kit (Qiagen) was used to isolate plasmids, according to the manufacturer's instructions.

### - Determination of limit of detection (LOD)

An optimal annealing temperature was identified for each of the four genes. For each gene, 10,000 copies of the wild-type (wt) allele were mixed with 10,000 copies of the mutant allele, and droplet digital PCR (ddPCR) was performed with eight different annealing temperatures (range: 53°C to 63°C) to identify the

optimal temperature at which the wt and mutant droplets are separated enough. The optimal annealing temperature for each assay was: 60°C for *TERT* c.-124C>T, 59°C for *TERT* c.-146C>T, 56.5°C for *ATM* and 57.5°C for *TP53*. Then, we detected the LOD for each assay performing the ddPCR with 10,000 copies of wt allele and different copies of mutant allele as indicated in the following table:

| Wild-types copies | Mutant copies |
|-------------------|---------------|
| 10,000            | 5,000         |
| 10,000            | 2,500         |
| 10,000            | 1,000         |
| 10,000            | 500           |
| 10,000            | 250           |
| 10,000            | 150           |
| 10,000            | 100           |
| 10,000            | 50            |
| 10,000            | 10            |
| 10,000            | 5             |
| 10,000            | 1             |
| 10,000            | 0             |

The LOD of the mutant allele was 0.08% for *TERT* c.-124C>T and *TERT* c.-146C>T, 0.05% for *ATM* c.1236-2A>T and 0.1% for *TP53* c.853G>A.

#### - ddPCR

The reactions for custom assays (*ATM* and *TERT* c.-124C>T) were performed with 11 µl SuperMix no dUTP (Bio-Rad), 0.5 µl forward + reverse primers (40

μM), 1.1 μl HEX probe (5 μM), 1.1 μl FAM probe (5 μM) and 8.3 μl cfDNA sample. The reactions for commercial assays (*TP53* and *TERT* c.-146C>T) were performed with 11 μl SuperMix no dUTP (Bio-Rad), 1.1 μl assay (20 μM), 1.6 μl H<sub>2</sub>O and 8.3 μl cfDNA sample. PCR was performed as follows; 95°C for 10 min then 40 cycles (except for *TERT* c.-124C>T which was 50 cycles) of 94°C for 30 seconds, the specific assay annealing temperature for 1 min, followed by 98°C for 10 min, and a final hold at 4°C. Each reaction was performed with a negative control (10,000 copies wt allele + 0 copy mutant allele) and positive control (10,000 copies wt allele + 10 copies mutant allele).

ctDNA was defined as detectable if the mutant allele fraction (MAF) was above the LOD of each mutant amplicon.

## SUPPLEMENTARY TABLES

**Table S1. Mean cfDNA fragment size (bp) of MIBC patients during follow-up according to tumor progression and death.**

|                      |                           | Cystectomy<br>(N= 37) | 1 month<br>(N= 37) | 4 months<br>(N= 38) | 12 months<br>(N= 34) |
|----------------------|---------------------------|-----------------------|--------------------|---------------------|----------------------|
| TUMOR<br>PROGRESSION | Progressive               | 164.47                | 158.94             | 167.71              | 159.38               |
|                      | Non-progressive           | 154.50                | 158.20             | 212.53              | 158.37               |
| DEATH                | Cancer-specific death     | 163.50                | 160.71             | 161.57              | 161.30               |
|                      | Non-cancer-specific death | 156.39                | 157.22             | 210.37              | 157.64               |

\*There were no significant differences ( $p>0.05$ ) between progressive and non-progressive patients as well as between cancer-specific death and non-cancer-specific death at each follow-up time point.

**Table S2. Mean MAF of each gene between (A) progressive and non-progressive MIBC patients and (B) patients who died due to BC at the different follow-up time points.**

A)

|                           | Cystectomy            |                            | 1 month                |                            | 4 months               |                            | 12 months              |                            |
|---------------------------|-----------------------|----------------------------|------------------------|----------------------------|------------------------|----------------------------|------------------------|----------------------------|
|                           | Progressive<br>(N=17) | Non-Progressive<br>(N= 20) | Progressive<br>(N= 17) | Non-Progressive<br>(N= 20) | Progressive<br>(N= 17) | Non-Progressive<br>(N= 19) | Progressive<br>(N= 13) | Non-Progressive<br>(N= 19) |
| <i>TERT</i><br>c.-124C>T  | 0.17*<br>(N= 11)      | 0.19*<br>(N= 13)           | 0.08*<br>(N= 11)       | 0.07*<br>(N= 13)           | 1.45<br>(N= 11)        | 0.05<br>(N= 13)            | 4.52<br>(N= 8)         | 0.07<br>(N= 13)            |
| <i>TERT</i><br>c.-146C>T  | 0.01*<br>(N= 2)       | 0.24*<br>(N= 3)            | 0.01*<br>(N= 2)        | 0.05*<br>(N= 3)            | 0.01*<br>(N= 2)        | 0.09*<br>(N= 2)            | 0.05*<br>(N= 2)        | 0.12*<br>(N= 2)            |
| <i>ATM</i><br>c.1236-2A>T | 0.10*<br>(N= 8)       | 0.13*<br>(N= 8)            | 0.05*<br>(N= 8)        | 0.01*<br>(N= 8)            | 0.04*<br>(N= 8)        | 0.01*<br>(N= 7)            | 0.01*<br>(N= 6)        | 0.04*<br>(N= 7)            |
| <i>TP53</i><br>c.853G>A   | 0.90*<br>(N= 2)       | 1.77*<br>(N= 4)            | 0.33*<br>(N= 2)        | 0.70*<br>(N= 4)            | 1.86*<br>(N= 2)        | 1.24*<br>(N= 4)            | 1.50*<br>(N= 2)        | 1.80*<br>(N= 4)            |

\*There were no significant differences ( $p>0.05$ ) between progressive and non-progressive patients.

B)

|                           | <b>Cystectomy</b>          |                                | <b>1 month</b>             |                                | <b>4 months</b>            |                                | <b>12 months</b>           |                                |
|---------------------------|----------------------------|--------------------------------|----------------------------|--------------------------------|----------------------------|--------------------------------|----------------------------|--------------------------------|
|                           | Patients<br>CSD<br>(N= 14) | Patients<br>non-CSD<br>(N= 23) | Patients<br>CSD<br>(N= 14) | Patients<br>non-CSD<br>(N= 23) | Patients<br>CSD<br>(N= 14) | Patients<br>non-CSD<br>(N= 22) | Patients<br>CSD<br>(N= 10) | Patients<br>non-CSD<br>(N= 22) |
| <i>TERT</i><br>c.-124C>T  | 0.20*<br>(N= 10)           | 0.18*<br>(N= 14)               | 0.09*<br>(N= 10)           | 0.08*<br>(N= 14)               | 1.61<br>(N= 10)            | 0.05<br>(N= 14)                | 5.26<br>(N= 6)             | 0.07<br>(N= 14)                |
| <i>TERT</i><br>c.-146C>T  | 0.03*<br>(N= 1)            | 0.18*<br>(N= 4)                | 0.02*<br>(N= 1)            | 0.03*<br>(N= 4)                | 0.02*<br>(N= 1)            | 0.06*<br>(N= 3)                | 0.05*<br>(N= 1)            | 0.11*<br>(N= 3)                |
| <i>ATM</i><br>c.1236-2A>T | 0.13*<br>(N= 6)            | 0.10*<br>(N= 10)               | 0.06*<br>(N= 6)            | 0.01*<br>(N= 10)               | 0.05*<br>(N= 6)            | 0.01*<br>(N= 9)                | 0.01*<br>(N= 4)            | 0.04*<br>(N= 9)                |
| <i>TP53</i><br>c.853G>A   | 0.90*<br>(N= 2)            | 1.77*<br>(N= 4)                | 0.33*<br>(N= 2)            | 0.70*<br>(N= 4)                | 1.86*<br>(N= 2)            | 1.24*<br>(N= 4)                | 1.50*<br>(N= 2)            | 1.80*<br>(N= 4)                |

Abbreviation: CSD; cancer-specific death

\*There were no significant differences ( $p>0.05$ ) between CSD and non-CSD at each follow-up time point.

**Table S3. Plasma mutations analyzed in each patient.**

|            | <i>TERT</i><br>c.-124C>T | <i>TERT</i><br>c.-146C>T | <i>ATM</i><br>c.1236-2A>T | <i>TP53</i><br>c.853G>A |
|------------|--------------------------|--------------------------|---------------------------|-------------------------|
| Patient 1  | X                        |                          |                           |                         |
| Patient 2  | X                        |                          |                           |                         |
| Patient 3  | X                        |                          |                           |                         |
| Patient 4  | X                        |                          |                           |                         |
| Patient 5  | X                        |                          |                           |                         |
| Patient 6  | X                        |                          |                           |                         |
| Patient 7  | X                        |                          |                           |                         |
| Patient 8  |                          |                          | X                         |                         |
| Patient 9  | X                        |                          | X                         |                         |
| Patient 10 | X                        | X                        | X                         | X                       |
| Patient 11 | X                        |                          |                           |                         |
| Patient 12 |                          |                          |                           | X                       |
| Patient 13 | X                        |                          |                           |                         |
| Patient 14 |                          | X                        | X                         |                         |
| Patient 15 |                          | X                        | X                         |                         |
| Patient 16 |                          |                          | X                         |                         |
| Patient 17 | X                        |                          | X                         |                         |
| Patient 18 |                          | X                        |                           |                         |
| Patient 19 | X                        |                          |                           |                         |
| Patient 20 |                          | X                        | X                         |                         |
| Patient 21 |                          |                          |                           |                         |
| Patient 22 | X                        |                          |                           | X                       |
| Patient 23 |                          |                          | X                         | X                       |
| Patient 24 | X                        |                          |                           |                         |
| Patient 25 | X                        |                          |                           |                         |
| Patient 26 |                          |                          |                           |                         |
| Patient 27 |                          |                          | X                         |                         |
| Patient 28 | X                        |                          |                           |                         |
| Patient 29 | X                        |                          | X                         |                         |
| Patient 30 | X                        |                          | X                         |                         |
| Patient 31 | X                        |                          | X                         |                         |
| Patient 32 | X                        |                          |                           | X                       |
| Patient 33 | X                        |                          | X                         |                         |
| Patient 34 | X                        |                          | X                         |                         |
| Patient 35 |                          |                          | X                         |                         |
| Patient 36 | X                        |                          |                           | X                       |
| Patient 37 | X                        |                          |                           |                         |

**Table S4. Primers and probes used for droplet digital PCR.**

| Primers and Probes          | Company                        | Assay ID       | Custom-designed                                                                                                                                                     |
|-----------------------------|--------------------------------|----------------|---------------------------------------------------------------------------------------------------------------------------------------------------------------------|
| <i>TERT</i><br>(c.-146C>T)  | Thermo<br>Fisher<br>Scientific | Hs000000093_rm |                                                                                                                                                                     |
| <i>TP53</i><br>(c.853G>A)   | Thermo<br>Fisher<br>Scientific | C_153028087_10 |                                                                                                                                                                     |
| <i>TERT</i><br>(c.-124C>T)  | IDT                            |                | Fd primer seq:<br>CTCCTCCGCGCGGCACCCG<br>Rv primer seq:<br>AAACTCGCGCCGCGAGGA<br>Mutant probe:<br>CAGCCCCTTCCGGGCCCT (HEX)<br>Wt probe:<br>CGACCCCCTCCGGGCCCT (FAM) |
| <i>ATM</i><br>(c.1236-2A>T) | IDT                            |                | Fd primer seq:<br>TCCTTTTAGTTTGTTAATGTGATGGA<br>Rv primer seq:<br>TCATCAGTAATGGAGACAGCTCA<br>Mutant probe:<br>TGGCTACAGATTGCAACCCA (HEX)                            |

|  |  |  |                                         |
|--|--|--|-----------------------------------------|
|  |  |  | Wt probe:<br>AGGCTACAGATTGCAACCCA (FAM) |
|--|--|--|-----------------------------------------|

SUPPLEMENTARY FIGURES

A)

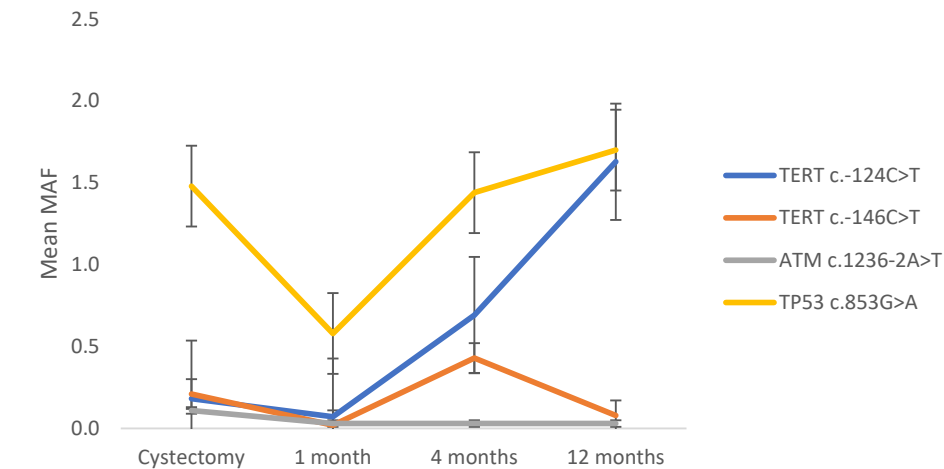

B)

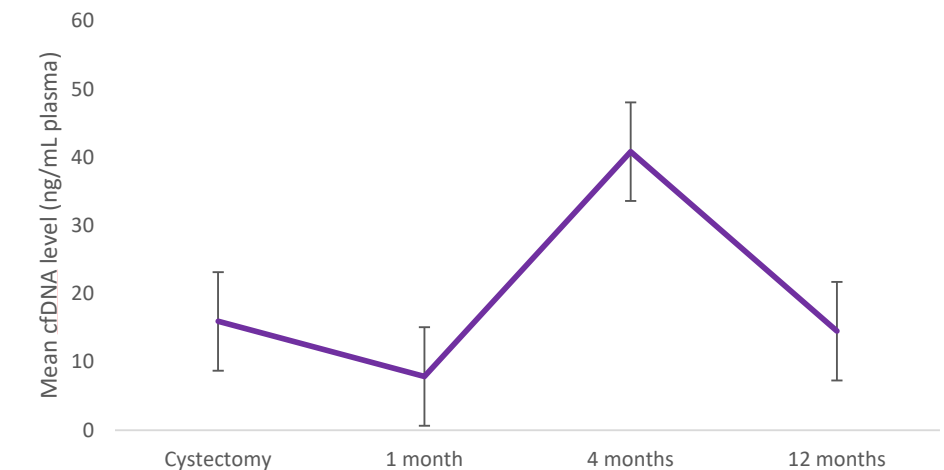

C)

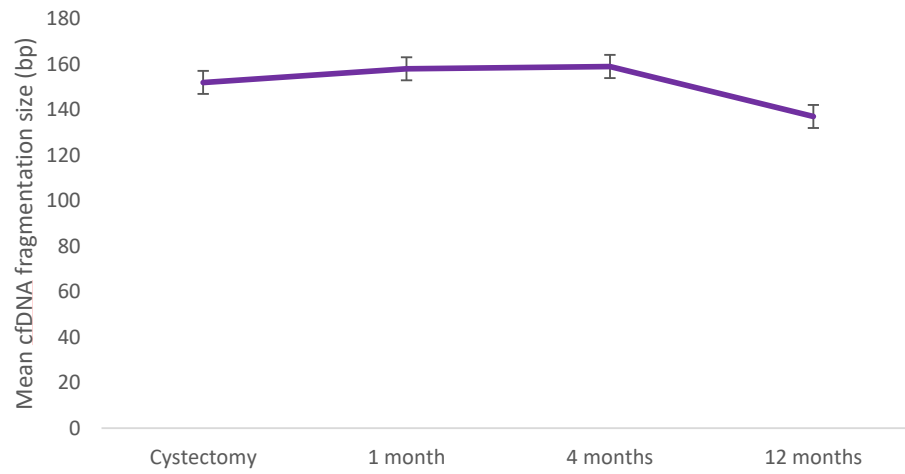

**Figure S1.** Monitoring of (A) ctDNA status, (B) cfDNA level and (C) cfDNA fragmentation patterns in MIBC patients.

A)

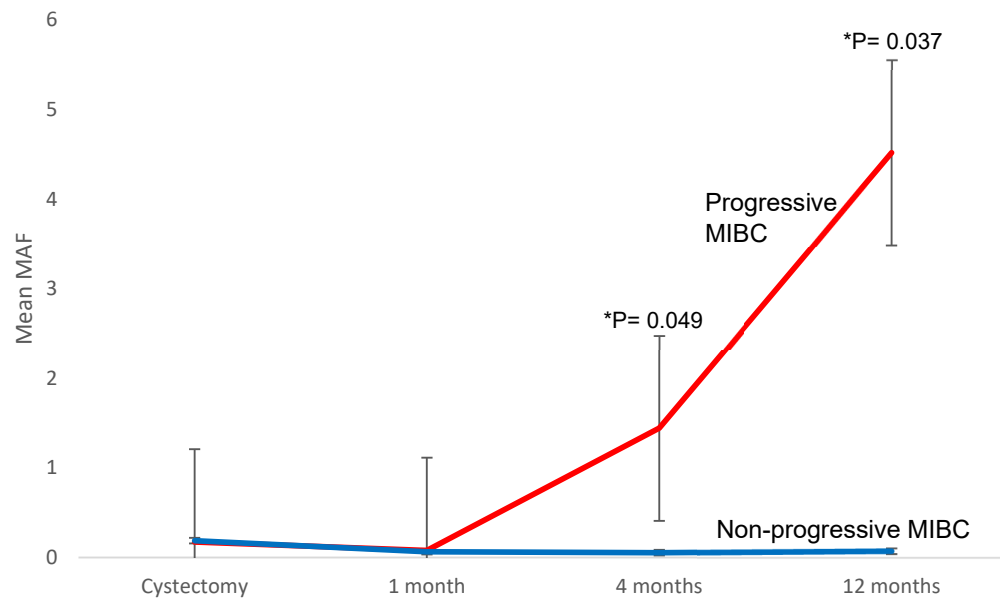

B)

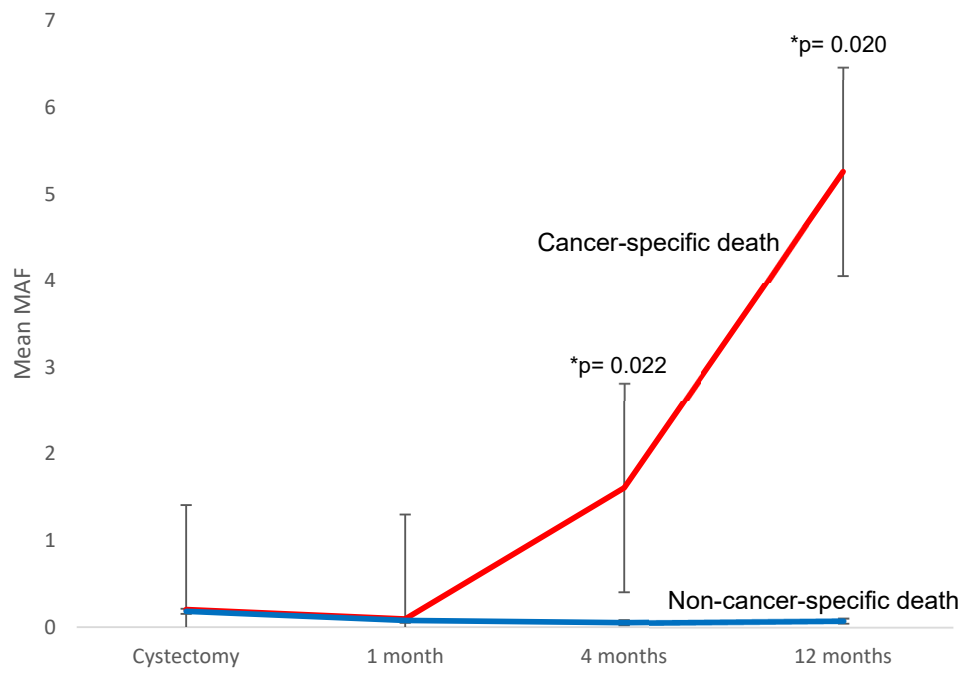

**Figure S2.** Mutation analysis of *TERT* c.-124C>T comparing MAF in MIBC patients according to (A) tumor progression and (B) death.

A)

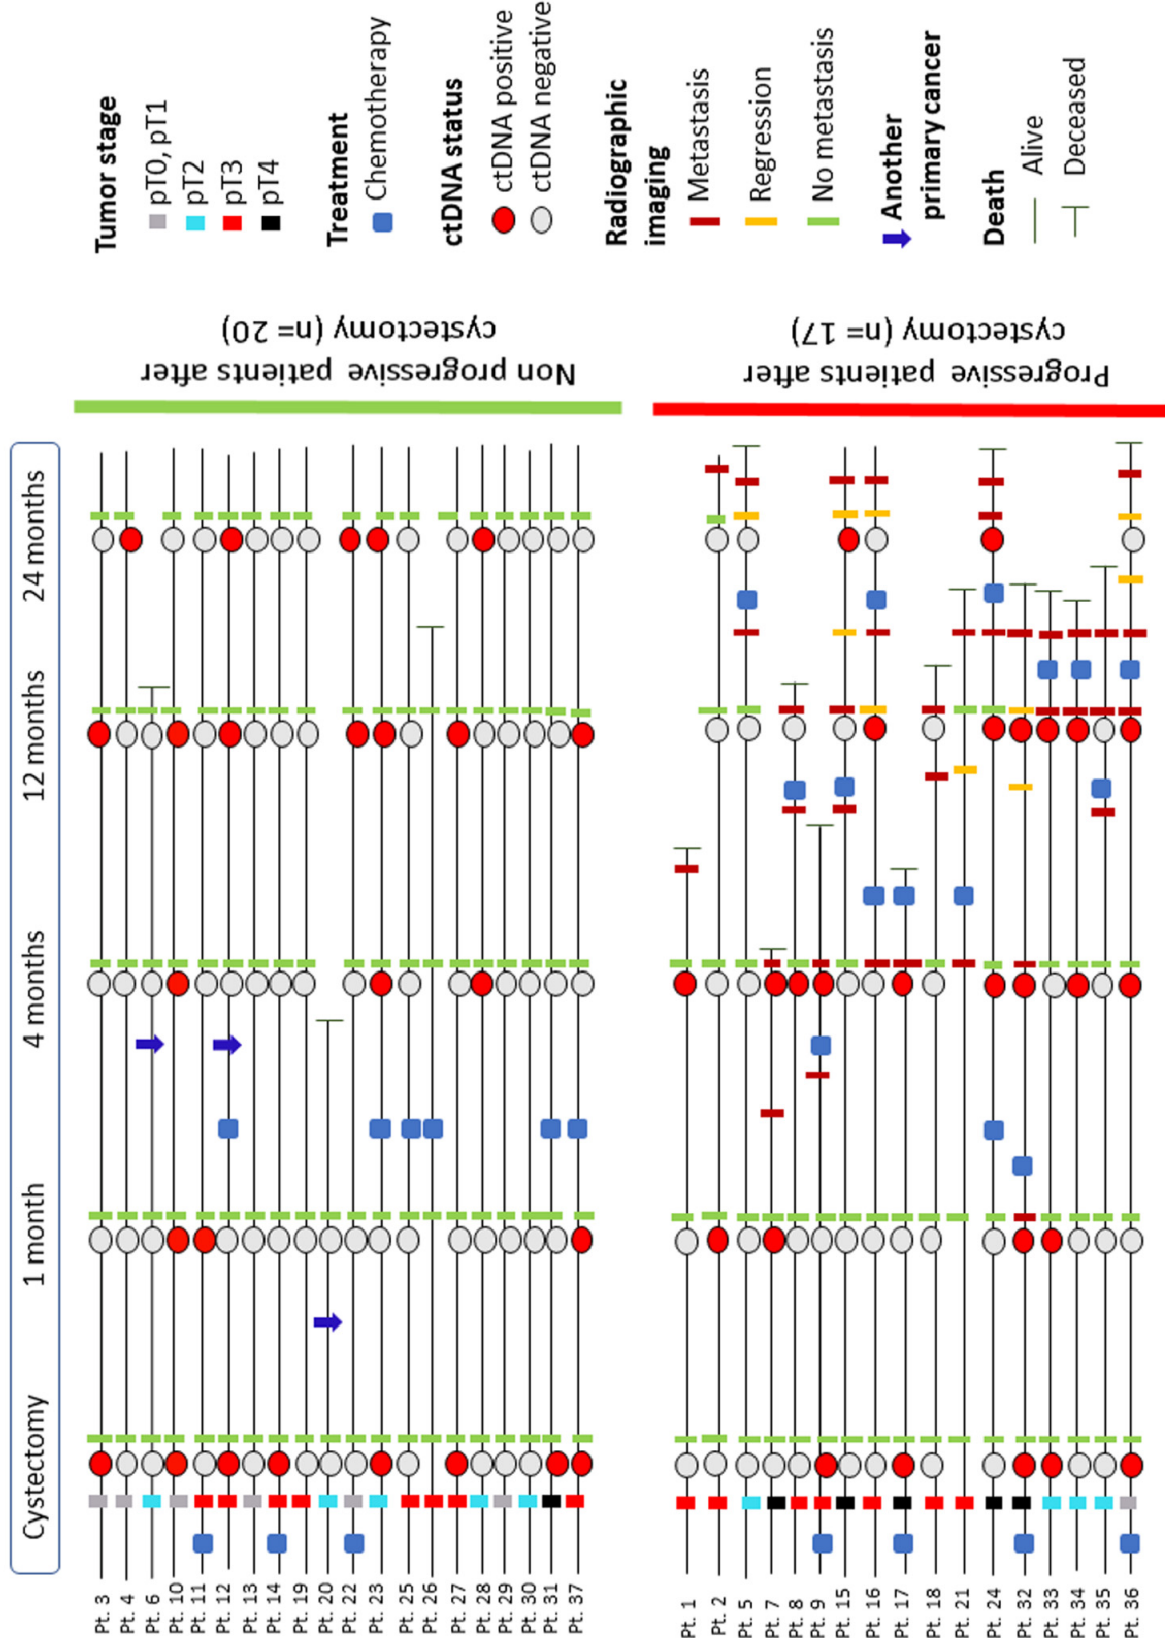

B)

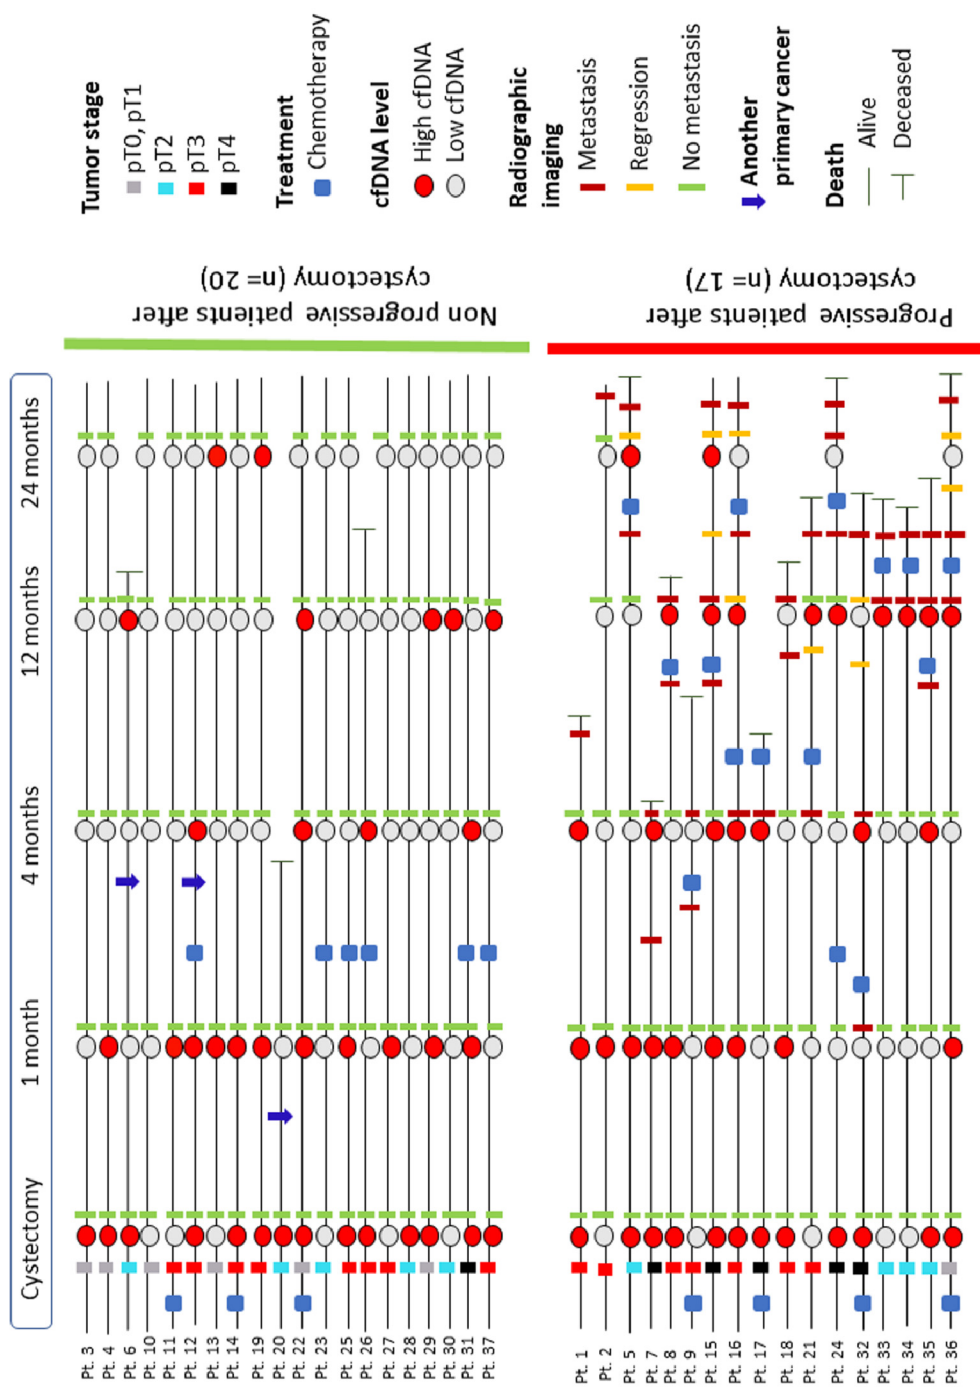

**Figure S3.** Longitudinal representation of (A) ctDNA status and (B) cfDNA level results for all samples analyzed at different follow-up time points from 37 MIBC patients.

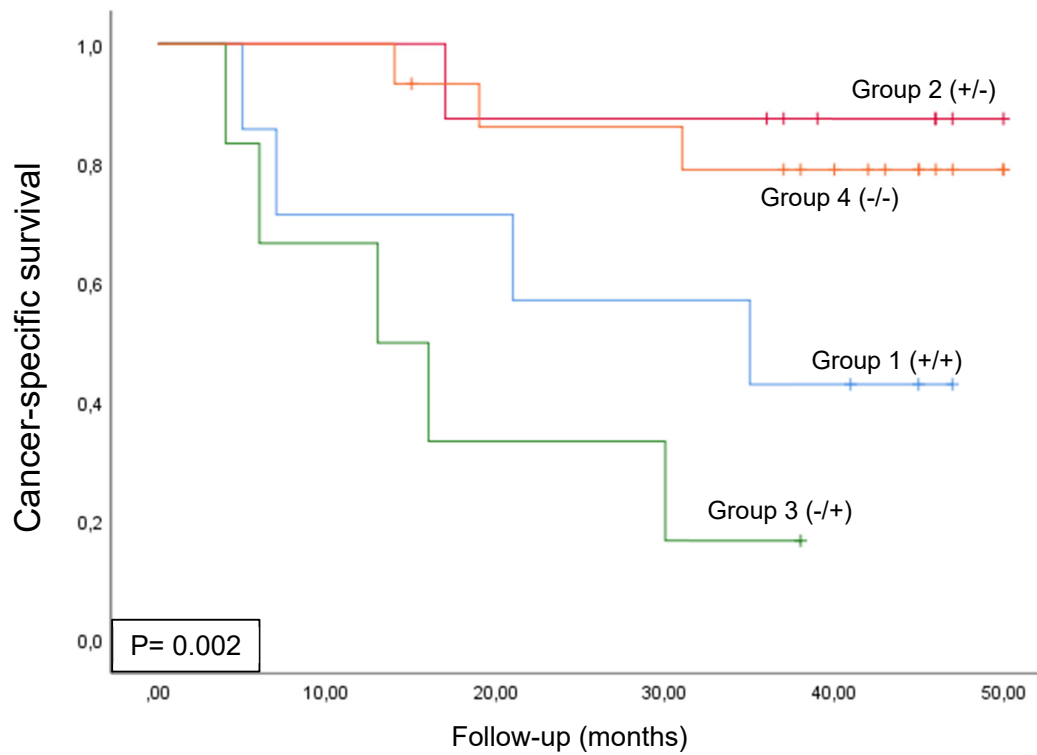

**Figure S4.** Kaplan-Meier curve for cancer-specific survival in four different MIBC groups stratified according to changes in ctDNA between baseline and four months after RC.
